# Supplementary material for: The tautomeric equilibrium and stereochemistry of β-sulfonyl enamines
Source: Royal Society of Chemistry journal article supplement (doi:10.1039/b200205a), 2002-01-01
Supplement: b200205a.doc [file b200205a.doc]

**Supporting Information**

**The tautomeric equilibrium and stereochemistry of b-sulfonylenamines**

Lech Kozerski * , Brunon Kwiecień, Piotr Krajewski, Robert Kawęcki, Elżbieta Bednarek, Jerzy Sitkowski, Wojciech Bocian, Wiktor Koźmiński, and Poul Erik Hansen

**Table 1S**. 1H -T1 relaxation times (s) in tautomeric forms of CH3-SO2-C2H=C1(CH3 )-NH-CNH(CH3)2a) (**8**).

| Isomer | CH3SO2 | C2H | C1CH3 | NH | CNH | CN(CH3)2 |
| --- | --- | --- | --- | --- | --- | --- |
| Z | 1.79 | 4.79 | 2.37 | 3.33 | 3.25 | 1.85 |
| E | 1.66 | 3.04 | 2.91 | n.d | 2.51 | 1.85 |
| b) | 3.21 | 1.49 | 4.64 |  | 0.49 | 0.73 |
| I-E | 2.36 | 2.17 | 3.11 |  | 3.25 | 1.85 |

a) Data were acquired on a degassed sample of 10 mg solute in 0.7mL of CDCl3. Accuracy ±0.02 s.

b) Data for respective signals of CH3-SO2-C2H2-C1 =O(CH3) and H2N-CNH(CH3)2

**Table 2S** Long range 3J (C,H) (± 0.2 Hz) coupling constants in selected b-sulfonyl enamines.

|  | Isomer | 2J | | 3J | | | | | | | |
| --- | --- | --- | --- | --- | --- | --- | --- | --- | --- | --- | --- |
|  |  | **C1**,C2**H** | **C1**, C**H3** | **C1**, CN**H**a) | **C2,** C**H3** | **C2**, SC**H3** b) | C1**C**H3, N**H** | C1**C**H3, C2**H** | | **C2**, N**H** | |
|  |  |  |  |  |  |  | simul. | Exp. | simul. | Exp. | simul. |
| **3** | Z |  |  |  |  |  |  |  |  | 3.6 |  |
|  | E-Zc) |  |  |  |  |  |  |  |  | 7.0 |  |
|  |  |  |  |  |  |  |  |  |  |  |  |
| **4** | Z |  |  |  |  |  |  |  |  | 3.4 |  |
|  | Ed) |  |  |  |  |  |  |  |  | 2.8 |  |
|  |  |  |  |  |  |  |  |  |  |  |  |
| **6** | E-E |  |  |  |  |  |  |  |  | 2.8e) |  |
|  |  |  |  |  |  |  |  |  |  |  |  |
| **8** | Z | 2.4 | 5.5 | 2.9 (9.0) | 5.2 | 1.2 | 6.2 | 5.0 | 5.0 |  | 2.8 |
|  | E | 1.8 | 5.5 | 2.4 (7.3) | 3.3 | 1.7 | f) | 6.4 | f) |  | 6.1 |
|  | I | 5.2 | 6.1 | 6.4 | 2.9 | 1.9 |  | 2.6 |  |  |  |
|  |  |  |  |  |  |  |  |  |  |  |  |
| **9** | Z |  |  |  | 5.5 |  | 7.4 | 5.2 |  | 3.5 |  |
|  | E |  |  |  | 3.5 |  | 3.7 | 6.7 |  | 6.5 |  |

a) Complementary coupling constant 3J(CN**H**, N**H**) is given in parentheses.

b ) 3J(S-**C**H3,C2**H**) coupling constants are equal 0 in all studied cases.

c) 1H NMR spectrum at -20C. Coupling constant about 2-3 Hz can not be determined because signal of E-E form is too broad .

d) 1H NMR spectrum at 27C of E-Z and E-E mixture.

e) This coupling constant can be also assigned as 2J(**C**2,C1**H) .** Analogous value of this coupling was observed for **4** where signal of carbon atom C2 was a triplet. In this case instead of two possible coupling constants we observed only one.

f ) Simulation can not be performed due to overlap in the proton coupled spectrum of the C1- **C**H3 methyl group with the C1-**C**H3 group in Z isomer.

**Table 3S**. Experimental steady-state NOEs for compound ***Z-*8** measured in CDCl3 at –15°C. In parentheses NOEs calculated for the lowest energy conformer from DFT calculations. Estimated precision of experimental NOEs is ±2%. An asterisk denotes possible experimental errora)

| **Irradiated**  **proton** | **Observed proton** | | | | |
| --- | --- | --- | --- | --- | --- |
|  | **Z**-NH | **Z**-C2H | **Z**-CNH | **Z**-SMe | **Z**-C1Me |
| **Z**-NH |  | 1.6 (0.9) | 3.1 (2.2) | 0.2 (0.1) | 0.2 (0.1) |
| **Z**-C2H | 0.8 (0.7) |  | 0.2 (-0.1) | 0.1 (0.4) | 3.0 (1.2) |
| **Z**-CNH | 3.8 (2.4) | 2.4 (-0.2) |  | 2.2 (0.0) | 5.9* (1.7) |
| **Z**-SMe | 3.3 (0.8) | 5.5 (5.3) | 0.5 (0.0) |  | -0.2 (0.0) |
| **Z**-C1Me | 0.4 (0.9) | 21.0 (18.0) | 12.1 (19.1) | -0.6 (0.0) |  |

a) The experimental error may be due to different rotational correlation time for the methyl rotation, which is not treated explicitly in NOE program.

**Table 4S**. Experimental steady-state NOEs for compound **E*-*8** measured in CDCl3 at –15°C. In parentheses NOEs calculated for the lowest energy conformer from DFT calculations. Estimated precision of experimental NOEs is ±2%. An asterisk denotes possible experimental error.

| **Irradiated**  **proton** | **Observed proton** | | | | |
| --- | --- | --- | --- | --- | --- |
|  | **E** -C2H | **E** -NH | **E** –CNH | **E** -SMe | **E** -C1Me |
| **E** -C2H |  | 1.0 (0.1) | 19.1 (18.9) | 0.8 (0.3) | 0.5 (0.1) |
| **E** -NH | 1.5 (0.2) |  | 1.9 (2.8) | 0.8 (0.0) | 5.3* (1.4) |
| **E** –CNH | 22.9 (21.9) | 3.6 (2.1) |  | 1.2 (0.0) | 1.2 (0.0) |
| **E** -SMe | 5.6 (3.6) | 2.3 (0.1) | 0.7 (-0.5) |  | 2.5 (0.3) |
| **E** -C1Me | 4.2 (1.4) | 11.7 (13.1) | 1.9 (-0.1) | 2.4 (0.3) |  |

**Table 5S** Saturation transfer and NOE for dynamic protons in the **4** a).

| Irradiated | Observed | | | | | |
| --- | --- | --- | --- | --- | --- | --- |
|  | Z-NH | E-C2H | Z-C2H | E-NH | I-C2H2 | H2O |
| Z-NH | * |  | 3.1 |  |  |  |
| E-C2H |  | * |  | 11.3 | -8.9 |  |
| Z-C2H | 5.0 |  | * |  |  |  |
| E-NH |  | 9.3 |  | * |  |  |
| I-C2H2 |  | -9.4 | -1.8 |  | * | -1.5 |
| H2O |  |  |  | -4.5 | -4.9 | * |

a) 10 mg sample in 0.7 mL CDCl3 at 30 °C, degassed; isomers ratio E:Z:I = 0.57 : 0.37 : 0.06; molar ratio initial enamine:H2O = 4 : 1; NOE for Z-C1H {Z-C2H}=7.7

**Fig 1S** The 1H NMR spectrum of **8** in CD2Cl2 taken at -60 °C. The molecular water at 1.5 ppm is not seen at this temperature.

**Fig. 2S** Part of TOCSY spectrum of **7** in CDCl3 solution at 27 °C. In the expansion of the spectrum the correlation peaks for the signal of C1H of imine ( 7.63 ppm on F1 axis) define seven chemical shifts for the aliphatic signals read on the F2 axis: i.e., 3.11 and 3.00; 2.24 and 2.13; 2.46 and 2.35 for C5H2, C4H2 and C3H2, respectively. Similarly, the values for the chemical shifts of aliphatic protons on F2 axis are given as correlation peaks to C1H signal of enamine E ( 6.98 ppm on F1 axis), i.e., 2.93; 2.21 and 2.44 and enamine Z ( 6.43 ppm on F1 axis): 3.01; 2.16 and 2.61 for C5H2, C4H2 and C3H2.
